# Supplementary material for: Brief Communication: An Ice-Debris Avalanche in the Nupchu Valley, Kanchenjunga Conservation Area, Eastern Nepal
Source: Copernicus journal article supplement (doi:10.5194/egusphere-2023-624), 2023-05-24
Supplement: Supplementary file [file egusphere-2023-624-CC1-supplement.pdf]

Fig2: is there no suitable satellite image closer after the event? Only several months later?

*Indeed, the number of cloud-free images from after the event was disappointing. There are images from Aug 21, 24, 25, Sept 21, Oct 3, 8, with clouds obscuring the source area, as well as some where fresh snowfall (e.g. Oct 16) makes interpretation trickier. While we could map the distribution of the debris sheet from the earlier imagery (e.g. Aug 21), we felt it better to show a later image in which the source zone (and the changes therein) is easier to see. I have attached an example image from Aug 24.*

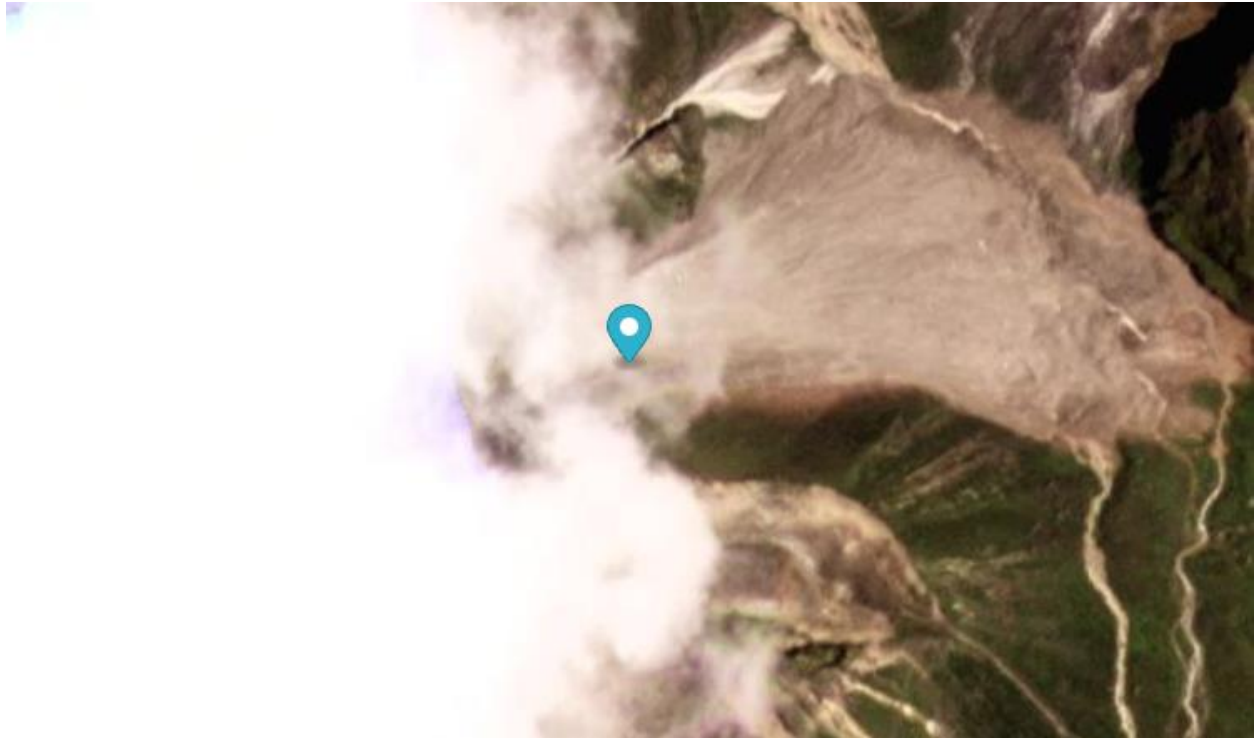

*Example Planetscope image from Aug 24*
